# Supplementary material
Source: MDPI journal article supplement (https://www.mdpi.com/2071-1050/13/14/8079)
Supplement: s1 [file s1]

Article

# Metagenomic Study of the Community Structure and Functional Potentials in Maize Rhizosphere Microbiome: Elucidation of Mechanisms behind the Improvement in Plants under Normal and Stress Conditions

Oluwadara Pelumi Omotayo, Ozede Nicholas Igiehon and Olubukola Oluranti Babalola \*

Food Security and Safety Niche, Faculty of Natural and Agricultural Sciences, North-West University, Private Mail Bag X2046, Mmabatho 2735, South Africa

\* Correspondence: olubukola.babalola@nwu.ac.za; Tel.: +27-18-389-2568

**Table S1.** Sequence Information.

| Samples                              | F1            | F2            | R1            | R2            |
|--------------------------------------|---------------|---------------|---------------|---------------|
| <b>Uploaded Sequence Information</b> |               |               |               |               |
| bp Count                             | 2,623,527,356 | 2,731,731,774 | 2,380,333,740 | 2,250,315,908 |
| Sequence Count                       | 18,942,494    | 18,442,769    | 15,666,716    | 15,045,869    |
| Mean Sequence Length (bp)            | 150±51        | 149±50        | 150±51        | 149±49        |
| Mean GC content (%)                  | 65±11         | 64±11         | 64±10         | 65±11         |
| <b>Post QC Information</b>           |               |               |               |               |
| bp Count                             | 2,483,506,626 | 2,553,486,961 | 2,241,569,933 | 2,121,428,345 |
| Sequence Count                       | 17,309,422    | 16,779,302    | 14,404,078    | 13,867,146    |
| Mean Sequence Length (bp)            | 154±46        | 153±47        | 154±48        | 153±46        |
| Mean GC content (%)                  | 65±9          | 65±9          | 65±9          | 66±9          |
| <b>Processed Sequences</b>           |               |               |               |               |
| Predicted protein features           | 15,115,042    | 14,640,757    | 12,856,164    | 12,362,029    |
| Predicted rRNA features              | 32,623        | 34,297        | 31,580        | 30,226        |
| <b>Aligned Sequences</b>             |               |               |               |               |
| Identified protein features          | 5,391,241     | 5,549,864     | 4,763,335     | 4,954,381     |
| Identified rRNA features             | 7248          | 7664          | 6847          | 7676          |

**Table S2.** Diversity evaluation of bacteria (at phyla level) in soil samples.

| Phylum                       | F1         | F2          | R1         | R2          |
|------------------------------|------------|-------------|------------|-------------|
| <b>Actinobacteria</b>        | 29.37±1.79 | 25.17±0.37  | 23.95±0.31 | 34.40±0.94  |
| <b>Crenarchaeota</b>         | 13.21±0.46 | 9.12±2.65   | 9.70±0.49  | 8.99±2.55   |
| <b>Bacteroidetes</b>         | 3.71±0.56  | 4.92±0.16   | 4.86±0.19  | 4.99±2.25   |
| <b>Euryarchaeota</b>         | 29.51±2.46 | 29.77±3.92  | 22.21±2.70 | 25.80±8.69  |
| <b>Korarchaeota</b>          | 0.29±0.02  | 0.26±0.01   | 0.26±0.03  | 0.31±0.12   |
| <b>Chlorobi</b>              | 0.13±0.00  | 0.13±0.04   | 0.16±0.00  | 0.11±0.01   |
| <b>Chloroflexi</b>           | 2.67±0.26  | 2.03±0.20   | 2.93±0.04  | 2.19±0.26   |
| <b>Nanoarchaeota</b>         | 0.01±0.01  | 0.00±0.01   | 0.00±0.03  | 0.01±0.04   |
| <b>Cyanobacteria</b>         | 1.16±0.09  | 1.11±0.27   | 1.51±0.12  | 1.03±0.17   |
| <b>Thaumarchaeota</b>        | 23.11±0.85 | 16.39±6.69  | 26.51±0.21 | 22.96±6.59  |
| <b>DeinococcusThermus</b>    | 0.47±0.04  | 0.44±0.07   | 0.47±0.01  | 0.44±0.01   |
| <b>Ascomycota</b>            | 32.05±2.06 | 42.28±12.75 | 39.98±3.55 | 40.06±17.50 |
| <b>Basidiomycota</b>         | 1.72±0.04  | 2.07±0.49   | 1.23±0.09  | 1.71±0.38   |
| <b>Blastocladiomycota</b>    | 0.01±0.00  | 0.01±0.00   | 0.00±0.00  | 0.01±0.00   |
| <b>Firmicutes</b>            | 2.72±0.04  | 2.41±0.55   | 2.72±0.14  | 2.72±0.79   |
| <b>Chytridiomycota</b>       | 0.03±0.01  | 0.05±0.02   | 0.05±0.00  | 0.10±0.08   |
| <b>Gemmatimonadetes</b>      | 4.53±0.01  | 6.69±2.28   | 2.67±0.60  | 2.32±0.03   |
| <b>Microsporidia</b>         | 0.06±0.25  | 0.04±0.02   | 0.03±0.02  | 0.03±0.00   |
| <b>Nitrospirae</b>           | 0.49±0.06  | 0.46±0.14   | 0.47±0.04  | 0.30±0.02   |
| <b>Planctomycetes</b>        | 1.94±0.09  | 1.81±0.56   | 3.49±0.06  | 2.10±0.34   |
| <b>Proteobacteria</b>        | 50.59±1.90 | 52.42±4.32  | 53.02±0.82 | 47.17±0.48  |
| <b>Neocallimastigomycota</b> | 0.00±0.00  | 0.00±0.02   | 0.00±0.00  | 0.00±0.01   |
| <b>Verrucomicrobia</b>       | 1.83±0.05  | 1.99±0.64   | 3.24±0.20  | 1.86±0.22   |

Mean±standard deviation (n=3). F1=maize rhizosphere samples from Lichtenburg (first site), F2= bulk soil samples from Lichtenburg, R1=Rhizosphere soil samples from Randfontein (second site), R2=bulk soil samples from Randfontein.

**Table S3.** Major functional categories in samples at level 1 subsystem.

|                                                           | <b>F1</b>  | <b>F2</b>  | <b>R1</b>  | <b>R2</b>  |
|-----------------------------------------------------------|------------|------------|------------|------------|
| <b>Iron acquisition and metabolism</b>                    | 0.60±0.02  | 0.55±0.01  | 0.46±0.03  | 0.51±0.05  |
| <b>Secondary Metabolism</b>                               | 0.36±0.00  | 0.35±0.02  | 0.34±0.03  | 0.32±0.00  |
| <b>Protein Metabolism</b>                                 | 6.95±0.00  | 6.900.02   | 6.93±0.09  | 6.96±0.18  |
| <b>RNA Metabolism</b>                                     | 15.39±0.01 | 10.19±7.95 | 10.12±0.00 | 4.45±7.91  |
| <b>Cofactors, Vitamins, Prosthetic Groups, Pigments</b>   | 6.62±0.07  | 6.66±0.01  | 6.69±0.00  | 6.72±0.00  |
| <b>Membrane Transport</b>                                 | 2.20±0.04  | 2.07±0.01  | 2.10±0.03  | 2.08±0.05  |
| <b>Virulence, Disease and Defense</b>                     | 2.52±0.01  | 2.35±0.04  | 2.47±0.01  | 2.57±0.07  |
| <b>Potassium metabolism</b>                               | 0.26±0.01  | 0.25±0.00  | 0.23±0.01  | 0.24±0.02  |
| <b>Phosphorus Metabolism</b>                              | 1.02±0.00  | 0.99±0.01  | 1.00±0.01  | 1.01±0.01  |
| <b>Nucleosides and Nucleotides</b>                        | 2.45±0.01  | 2.46±0.01  | 2.40±0.01  | 2.39±0.01  |
| <b>Motility and Chemotaxis</b>                            | 0.78±0.00  | 0.750.05   | 0.81±0.02  | 0.83±0.04  |
| <b>Miscellaneous</b>                                      | 7.22±0.00  | 7.18±0.07  | 7.23±0.05  | 7.21±0.03  |
| <b>Cell Wall and Capsule</b>                              | 3.68±0.02  | 3.55±0.01  | 3.64±0.02  | 3.73±0.04  |
| <b>Phages, Prophages, Transposable elements, Plasmids</b> | 0.88±0.01  | 0.91±0.01  | 0.90±0.00  | 0.91±0.01  |
| <b>Fatty Acids, Lipids, and Isoprenoids</b>               | 4.33±0.02  | 4.40±0.02  | 4.26±0.03  | 4.25±0.02  |
| <b>Dormancy and Sporulation</b>                           | 0.15±0.00  | 0.16±0.01  | 0.15±0.00  | 0.15±0.01  |
| <b>Carbohydrates</b>                                      | 4.55±0.04  | 10.04±7.89 | 10.09±0.04 | 15.91±7.92 |
| <b>Respiration</b>                                        | 2.67±0.03  | 2.64±0.05  | 2.86±0.02  | 2.79±0.01  |
| <b>Regulation and Cell signaling</b>                      | 1.13±0.00  | 1.09±0.01  | 1.13±0.02  | 1.15±0.01  |
| <b>Amino Acids and Derivatives</b>                        | 11.58±0.02 | 11.65±0.08 | 11.52±0.08 | 11.48±0.02 |
| <b>DNA Metabolism</b>                                     | 3.75±0.01  | 3.82±0.11  | 3.65±0.02  | 3.75±0.04  |
| <b>Nitrogen Metabolism</b>                                | 0.87±0.01  | 0.88±0.04  | 0.78±0.01  | 0.79±0.00  |
| <b>Photosynthesis</b>                                     | 0.09±0.00  | 0.11±0.00  | 0.09±0.00  | 0.09±0.00  |
| <b>Metabolism of Aromatic Compounds</b>                   | 1.95±0.01  | 1.96±0.02  | 1.99±0.04  | 2.03±0.09  |
| <b>Sulfur Metabolism</b>                                  | 1.06±0.02  | 1.04±0.03  | 1.05±0.01  | 1.02±0.03  |
| <b>Stress Response</b>                                    | 2.19±0.04  | 2.23±0.03  | 2.15±0.00  | 2.12±0.66  |
| <b>Clustering-based subsystems</b>                        | 13.70±0.01 | 13.74±0.03 | 13.68±0.01 | 13.650.04  |
| <b>Cell Division and Cell Cycle</b>                       | 1.03±0.01  | 1.06±0.02  | 1.050.01   | 1.05±0.02  |

Legend: Mean ± standard deviation (n=3). F1=maize rhizosphere samples from Lichtenburg (first site), F2= bulk soil samples from Lichtenburg, R1=Rhizosphere soil samples from Randfontein (second site), R2=bulk soil samples from Randfontein.
